# Supplementary material for: The prognostic impact of cardioselectivity of beta-blockers prescribed during hospitalization for decompensated heart failure.
Source: Research Square preprint supplement (doi:10.21203/rs.3.rs-8881908/v1), 2026-02-24
Supplement: Supplementary file 1 [file 23981888dc0aeb03c9c33be4.docx]

**Table 4:** Five-year mortality risk in groups according to cardioselectivity of beta-blockers and phenotype of heart failure

|  | **HFrEF** | | | **HFpEF** | |
| --- | --- | --- | --- | --- | --- |
| ***Partially adjusted model**** | | | | | |
| **All-cause mortality:**  A *versus* D  A *versus* C  A *versus* B | 0.42 (0.33-0.54)  0.59 (0.47-0.73)  0.54 (0.42-0.69) | | <0.001  <0.001  <0.001 | 0.76 (0.61-0.94)  0.84 (0.69-1.03)  0.89 (0.68-1.17) | 0.011  0.100  0.398 |
| **Cardiovascular mortality:**  A *versus* D  A *versus* C  A *versus* B | 0.45 (0.33-0.62)  0.53 (0.40-0.71)  0.52 (0.38-0.70) | | 0.001  <0.001  <0.001 | 0.86 (0.64-1.16)  0.80 (0.60-1.05)  1.02 (0.98-1.06) | 0.321  0.109  0.321 |
| **All-cause/non-malignant mortality:**  A *versus* D  A *versus* C  A *versus* B | 0.54 (0.42-0.71)  0.59 (0.46-0.75)  0.44 (0.34-0.57) | | <0.001<0.001  <0.001 | 0.74 (0.58-0.94)  0.82 (0.65-1.03)  0.88 (0.65-1.19) | 0.015  0.084  0.415 |
| ***Fully adjusted model †*** | | | | | |
| **All-cause mortality:**  A *versus* D  A *versus* C  A *versus* B | | 0.66 (0.52-0.85)  0.66 (0.46-0.92)  0.56 (0.37-0.84) | 0.001  0.016  0.005 | 0.80 (0.58-1.10)  0.82 (0.62-1.09)  1.06 (0.70-1.61) | 0.164  0.170  0.787 |
| **Cardiovascular mortality:**  A *versus* D  A *versus* C  A *versus* B | | 0.70 (0.41-1.19)  0.58 (0.37-0.89)  0.55 (0.33-0.93) | <0.001  0.013  0.025 | 1.07 (0.69-1.68)  0.66 (0.43-1.02)  1.09 (0.62-1.91) | 0.752  0.063  0.768 |
| **All-cause/non-malignant mortality:**  A *versus* D  A *versus* C  A *versus* B | | 0.57 (0.36-0.88)  0.62 (0.43-0.90)  0.55 (0.35-0.85) | 0.011  0.013  0.008 | 0.79 (0.55-1.13)  0.80 (0.59-1.10)  0.98 (0.62-1.15) | 0.194  0.175  0.936 |

Cox proportional hazard model [hazard ratio (95% confidence intervals)]; *******adjusted for age decade and gender;

***†*** adjusted for age decade, gender, year of hospitalization, hospitalization ≥10 days, HF etiology, coronary revascularization, history of malignancy, arterial hypertension atrial fibrillation or flutteru, history of smoking, LDL ≥1.8 mmol/L, diabetes mellitus, natriuretic peptides ≥10 times higher than ULN, estimated glomerular filtration, treatment with renin-angitensin-aldosteron axis blockers, aldosteron antagonists, statin, and dose of furosemide at discharge

A=highly selective, B= with blocking activity, C=cardioselective, D=nonselective of none
