# Supplementary material for: The prognostic impact of cardioselectivity of beta-blockers prescribed during hospitalization for decompensated heart failure.
Source: Research Square preprint supplement (doi:10.21203/rs.3.rs-8881908/v1), 2026-02-24
Supplement: Supplementary file 2 [file 4f6b4e8d6e4ad5d3c1d357f5.docx]

**Table 2.** Predictors of 5-year mortality (Cox proportional hazard model)

|  | **All-cause mortality** | |  | **Cardiovascular mortality** | |  | **All-cause/non-malignant mortality** | |
| --- | --- | --- | --- | --- | --- | --- | --- | --- |
|  | HRR (95% CIs) | *P*-value |  | HRR (95% CIs) | *P*-value |  | HRR (95% CIs) | *P*-value |
| Age decade  Male gender  Year of hospitalization§  Hospitalization ≥10 days  Coronary revascularization  History of malignancy  Atrial fibrillation or flutter  Ejection fraction ≤40%  History of smoking  Hypertension  LDL ≥1.8 mmol/L  Diabetes mellitus  eGFR <60 mL/min  BNP ≥10times ULN  Furosemide dose  Beta-blockers  RAS inhibitors  MRA  Statins  ICD | 1.48 (1.36-1.61)  1.24 (1.06-1.44)  0.60 (0.56-0.65)  1.15 (1.00-1.33)  0.98 (0.83-1.15)  1.43 (1.15-1.79)  0.93 (0.81-1.07)  1.14 (0.98-1.33)  1.18 (0.98-1.44)  1.21 (0.90-1.62)  0.89 (0.77-1.03)  1.11 (0.95-1.30)  1.08 (0.90-1.30)  1.29 (1.11-1.49)  1.28 (1.19-1.37)  0.88 (0.75-1.04)  0.78 (0.66-0.93)  0.89 (0.77-1.03)  0.86 (0.74-0.99)  0.59 (0.43-0.81) | <0.0001  0.0006  <0.0001  0.052  0.791  <0.0001  0.317  0.099  0.086  0.200  0.116  0.186  0.426  0.001  <0.0001  0.140  0.005  0.106  0.040  0.001 |  | 1.57 (1.41-1.75)  1.16 (0.95-1.41)  0.56 (0.51-0.62)  1.23 (1.02-1.48)  1.09 (0.88-1.34)  0.93 (0.65-1.31)  0.96 (0.80-1.16)  1.32 (1.08-1.61)  1.07 (0.82-1.39)  1.15 (0.79-1.68)  0.89 (0.73-1.08)  1.07 (0.87-1.31)  1.12 (0.88-1.43)  1.20 (0.99-1.46)  1.23 (1.12-1.34)  1.10 (0.88-1.38)  0.86 (0.68-1.09)  1.00 (0.83-1.21)  0.78 (0.66-0.97)  0.52 (0.34-0.81) | <0.0001  0.139  <0.0001  0.033  0.433  0.664  0.655  0.006  0.616  0.470  0.240  0.504  0.361  0.057  <0.0001  0.400  0.209  0.993  0.020  0.003 |  | 1.50 (1.37-1.64)  1.19 (1.01-1.40)  0.59 (0.55-0.65)  1.17 (1.01-1.37)  1.01 (0.84-1.20)  0.89 (0.66-1.20)  0.93 (0.79-1.08)  1.20 (1.02-1.42)  1.17 (0.95-1.50)  1.16 (0.84-1.59)  0.87 (0.74-1.02)  1.12 (0.94-1.33)  1.22 (1.00-1.51)  1.25 (1.07-1.47)  1.26 (1.17-1.36)  0.90 (0.75-1.07)  0.81 (0.67-0.98)  0.94 (0.80-1.10)  0.87 (0.74-1.01)  0.53 (0.37-0.76) | <0.0001  0.041  <0.0001  0.043  0.950  0.449  0.337  0.031  0.137  0.370  0.083  0.206  0.055  0.006  <0.0001  0.233  0.028  0.427  0.085  <0.0001 |

HRR, hazard risk ratio; CIs, confidence intervals; eGFR, estimated glomerular filtration (CKD-EPI formula); BNP, brain natriuretic peptide; ULN, the upper limit of normal; RAS, renin-angiotensin system; MRA, mineralocorticoid receptor antagonists. ICD, implanted cardioverter-defibrillator

§ 2010-12, 2013-15, 2019-18, 2019-20; for definitions of all other variables, *see* Methods or Table 1;
