# Supplementary material for: The prognostic impact of cardioselectivity of beta-blockers prescribed during hospitalization for decompensated heart failure.
Source: Research Square preprint supplement (doi:10.21203/rs.3.rs-8881908/v1), 2026-02-24
Supplement: Supplementary file 3 [file 8c1fa43a589a415f419d661c.docx]

**Table 3:** Five-year mortality risk in groups according to cardioselectivity of beta-blockers

|  | **Highly selective betablockers (A)** | | | **With blocking activity (B)** | **Cardioselective**  **(C)** | **Nonselective or none (D)** | |
| --- | --- | --- | --- | --- | --- | --- | --- |
| ***Partially adjusted model**** | | | | | | | |
| **All-cause mortality:**  A *versus* D  A *versus* C  A *versus* B | 0.64 (0.54-0.76)  0.74 (0.62-0.89)  0.76 (0.65-0.89) | | <0.001  0.001  <0.001 | -  -  1 | -  1  - | | **1**  **-**  **-** |
| **Cardiovascular mortality:**  A *versus* D  A *versus* C  A *versus* B | 0.69 (0.55-0.84)  0.69 (0.56-0.84)  0.68 (0.54-0.87) | | 0.001  <0.001  0.002 | -  -  1 | -  1  - | | **1**  **-**  **-** |
| **All-cause/non-malignant mortality:**  A *versus* D  A *versus* C  A *versus* B | 0.63 (0.52-0.76)  0.74 (0.63-0.88)  0.73 (0.60-0.89) | | <0.0010.001  0.002 | -  -  1 | -  1  - | | **1**  **-**  **-** |
| ***Fully adjusted model †*** | | | | | | | |
| **All-cause mortality:**  A *versus* D  A *versus* C  A *versus* B | | 0.66 (0.52-0.85)  0.78 (0.63-0.97)  0.75 (0.57-0.98) | 0.001  0.027  0.037 | -  -  1 | -  1  - | | **1**  **-**  **-** |
| **Cardiovascular mortality:**  A *versus* D  A *versus* C  A *versus* B | | 0.66 (0.54-0.81)  0.69 (0.52-0.92)  0.76 (0.53-1.09) | <0.001  0.011  0.142 | -  -  1 | -  1  - | | **1**  **-**  **-** |
| **All-cause/non-malignant mortality:**  A *versus* D  A *versus* C  A *versus* B | | 0.67 (0.51-0.88)  0.74 (0.58-0.94)  0.68 (0.51-0.92) | 0.004  0.013  0.013 | -  -  1 | -  1  - | | **1**  **-**  **-** |

Cox proportional hazard model [hazard ratio (95% confidence intervals)]; *******adjusted for age decade, gender, and ejection fraction ≤40%;

***†*** adjusted for age decade, gender and ejection fraction ≤40%, year of hospitalization, hospitalization ≥10 days, HF etiology, coronary revascularization, history of malignancy, arterial hypertension atrial fibrillation or flutteru, history of smoking, LDL ≥1.8 mmol/L, diabetes mellitus, natriuretic peptides ≥10 times higher than ULN, estimated glomerular filtration, treatment with renin-angitensin-aldosteron axis blockers, aldosteron antagonists, statin and dose of furosemide at discharge
