# Supplementary material for: The prognostic impact of cardioselectivity of beta-blockers prescribed during hospitalization for decompensated heart failure.
Source: Research Square preprint supplement (doi:10.21203/rs.3.rs-8881908/v1), 2026-02-24
Supplement: Supplementary file 4 [file a918befb671d941ef2f9ccab.docx]

**Table 5:** Five-year mortality risk in groups according to the level of evidence of beta-blockers

|  | **Evidence-based BBs**  **(a)** | | **Non-evidence-based BBs (b)** | | **None BBs**  **(c)** | |
| --- | --- | --- | --- | --- | --- | --- |
| ***Partially adjusted model †*** | | | | | | |
| **All-cause mortality:**  a *versus* c  b *versus* c  a *versus* b | 0.78 (0.69-0.88)  -  0.98 (0.85-1.12) | <0.001  -  0.723 | -  0.83 (0.71-0.97)  1 | -  0.017 | 1  1  - |
| **Cardiovascular mortality:**  a *versus* c  b *versus* c  a *versus* b | 0.89 (0.76-0.99)  -  0.97 (0.82-1.16) | 0.031  -  0.764 | -  0.96 (0.78-1.18)  1 | -  0.712 | 1  1  - |
| ***Fully adjusted model $*** | | | | | |
| **All-cause mortality:**  a *versus* c  b *versus* c  a *versus* b | 0.84 (0.71-0.99)  -  1.00 (0.82-1.20) | 0.048  -  0.957 | -  0.87 (0.70-1.09)  1 | -  0.235 | 1  1  - |
| **Cardiovascular mortality:**  a *versus* c  b *versus* c  a *versus* b | 1.04 (0.82-1.31)  -  0.97 (0.76-1.23) | 0.774  -  0.770 | -  0.97 (0.76-1.23)  1 | -  0.770 | 1  1  - |

***†***adjusted for age decade, gender, and ejection fraction ≤40%;

***$*** adjusted for age decade, gender and ejection fraction ≤40%, year of hospitalization, hospitalization ≥10 days, HF etiology, coronary revascularization, history of malignancy, arterial hypertension atrial fibrillation or flutteru, history of smoking, LDL ≥1.8 mmol/L, diabetes mellitus, natriuretic peptide ≥10 times higher than ULN, estimated glomerular filtration, implanted cardioverter, treatment with renin-angitensin-aldosteron axis blockers, aldosteron antagonists, statin, and dose of furosemide at discharge
