# Supplementary material for: The prognostic impact of cardioselectivity of beta-blockers prescribed during hospitalization for decompensated heart failure.
Source: Research Square preprint supplement (doi:10.21203/rs.3.rs-8881908/v1), 2026-02-24
Supplement: Supplementary file 5 [file c572e42c376eddbeee3507d2.docx]

**Table 1.** Baseline characteristics of study sample [mean (standard deviation) or *percentage*]

| n  Age [years]  *Gender [% of males]*  Length of hospitalization [days]  *Hospitalization ≥10 days [%]*  *Coronary heart disease*§ *[%]*  *Coronary revascularization [%]*  *History of smoking*† *[%]*  *Hypertension [%]*  LDL-cholesterol [mmol/L]  *LDL ≥1.8 mmol/L [%]*  Fasting glycemia [mmol/L]  *Diabetes mellitus***‡** *[%]*  Estimated glomerular filtration#[mL/min]  *Estimated glomerular filtration <60 mL/min*  *Peak brain natriuretic peptide ≥10times ULN*$*[%]*  *Atrial fibrillation or flutter [%]*  *Known history of malignancy*  *Implanted cardioverter-defibrillator*  Ejection fraction [%]  *Ejection fraction ≤40%* *[%]*  Concomitant pharmacotherapy [%]:  *Furosemide*  *Betalockers*  *Renin-angiotensin system blockers*  *Mineralocorticoid receptor antagonists*  *Statins*  *Antidiabetics*  Betablockers by subtypes* *[%]*:  *evidence-based*  *nonevidenced*  *highly selective*  *with blocking activity*  *cardioselective*  *nonselective* | 4053  70.9 (10.2)  *60.0*  9.6 (8.0)  *41.5*  *58.3*  *28.0*  *21.3*  *89.4*  2.28 (0.96)  *62.9*  7.33 (2.55)  *68.0*  47.8 (22.4)  *71.9*  *48.2*  *48.9*  *10.4*  *14.4*  42.0 (14.9)  *51.9*  *86.8*  *77.5*  *78.2*  *45.1*  *47.0*  *33.6*  *61.0*  *16.5*  *17.2*  *16.6*  *43.3*  *0.4* |
| --- | --- |

LDL, low-density lipoprotein; ULN, upper limit of normal;

§ as presumed primary etiology of heart failure (*see* Methods);†past or current smoking; **‡**highest fasting glucose ≥ 7 or non-fasting ≥ 11.1 mmol/L, history of diabetes and/or treatment with antidiabetics; $brain natriuretic peptide (BNP) ≥1000 ng/L or N-terminal-proBNP ≥3000 ng/L; #by CKD-EPI standard, lowest creatinine value during hospitalization was used; * *see* Methods for definitions (percentages are related to the total sample size, i.e. 4053 patients)
